# Supplementary material for: Ub-ProT reveals global length and composition of protein ubiquitylation in cells
Source: PubMed Central journal article supplement (PMC5802829; doi:10.1038/s41467-018-02869-x), 2018-02-06
Supplement: 41467_2018_2869_MOESM2_ESM.pdf [file 41467_2018_2869_MOESM2_ESM.pdf]

**Descriptions of Additional Supplementary Files:**

File Name: Supplementary Data 1

Description: (Dataset of Supplementary Fig. 2d)

File Name: Supplementary Data 2

Description: (Dataset of Fig. 3b)

File Name: Supplementary Data 3

Description: (Dataset of Fig. 3d)

File Name: Supplementary Data 4

Description: (Dataset of Supplementary Fig. 7a)

File Name: Supplementary Data 5

Description: (Dataset of Fig. 4b)

File Name: Supplementary Data 6

Description: (Dataset of Fig. 4c)

File Name: Supplementary Data 7

Description: (Dataset of Fig. 6c)
